# Supplementary material
Source: publisher figshare collection journal article supplement (https://karger.figshare.com/ndownloader/files/21846645)
Supplement: Supplementary file 1 [file 21846645]

**SUPPLEMENTARY MATERIAL**

Around 3% of 1,300 Levels Were Elevated during Infections in a Retrospective Review of 131 Beijing  
Hospital In-Patients with More than 24,000 days of Clozapine Treatment

Can-Jun Ruan, Ph.D., Yan-Nan Zang, MS, Yu-Hang Cheng, BS, Chuan-Yue Wang, M.D., Ph.D, Jose de  
Leon, M.D.

## Table of Contents

|                                                                         |    |
|-------------------------------------------------------------------------|----|
| Supplementary Results Section.....                                      | 3  |
| Supplementary Discussion Section.....                                   | 4  |
| Supplementary References.....                                           | 10 |
| Supplementary Table S1. Sample description.....                         | 12 |
| Supplementary Table S2. Description of 13 patients with inhibitors..... | 13 |
| Supplementary Table S3. Patient 1.....                                  | 14 |
| Supplementary Table S4. Patient 2.....                                  | 16 |
| Supplementary Table S5. Patient 3.....                                  | 19 |
| Supplementary Table S6. Patient 4.....                                  | 20 |
| Supplementary Table S7. Patient 5.....                                  | 21 |
| Supplementary Table S8. Patient 6.....                                  | 23 |
| Supplementary Table S9. Patient 7.....                                  | 25 |
| Supplementary Table S10. Patient 8.....                                 | 26 |
| Supplementary Table S11. Patient 9.....                                 | 27 |
| Supplementary Table S12. Patient 10.....                                | 28 |
| Supplementary Table S13. Patient 11. Not described.....                 | 30 |
| Supplementary Table S14. Patient 12.....                                | 31 |
| Supplementary Table S15. Patient 13.....                                | 32 |
| Supplementary Table S16. Patient 14.....                                | 33 |
| Supplementary Table S17. Patient 15.....                                | 34 |
| Supplementary Table S18. Patient 27.....                                | 35 |

## **SUPPLEMENTARY TEXT**

### **SUPPLEMENTARY RESULTS**

#### **Types of Infection/inflammation**

Patient 2 had four viral respiratory infections; therapeutic drug monitoring (TDM) data was available for two of them. Patient 7 had two possible infection episodes. Therefore, there were 18 infection/inflammation episodes with TDM in 16 patients. The types of infections in order of frequency were: respiratory viral infections (61%, 11/18), pneumonia (11%, 2/18), undiagnosed (16%, 3/18), skin abscess (6%, 1/18) and a possible gastrointestinal infection/inflammation (6%, 1/18) treated symptomatically

#### **Clinical Relevance of Infection at the Individual Level: Dose-correction Factor**

The dose-correction factors in episodes of respiratory infection were: 1) 0.44 and 0.64 in 2 cases of pneumonia, 2) 0.27 to 0.72 in 6 episodes of viral infection and leukocytosis, and 3) 0.61 to 1 (no relevant changes) in 5 episodes of viral infection with no leukocytosis. The rest of the infections were heterogeneous and required a dose correction factor of 0.60 for a skin abscess with leukocytosis, 0.39 and 0.66 in a patient with 2 undiagnosed episodes of possible viral infection, 0.62 for a gastrointestinal infection/inflammation and 0.27 for undiagnosed inflammation.

#### **Description of Inhibitors**

Some of the CYP1A2 inhibitors that may be prescribed in Western countries were not prescribed in our Beijing hospital. As the text reported, fluvoxamine was not prescribed. No patient was taking oral contraceptives or ciprofloxacin [S1]. Levofloxacin is not a CYP1A2 inhibitor [S2] so it was used to treat the two pneumonias. There is no access to caffeinated beverages in our hospital.

Supplementary Table S2 shows 13 patients (Patients 2, 10 and 16 to 26) who were prescribed imipramine, perphenazine, or sertraline, which are potentially clinically relevant clozapine inhibitors [S1, S3, S4].

#### **Clinical Relevance of Inhibitors at the Individual Level: Dose-correction Factors**

The footnotes of Supplementary Table S2 provide details on how baseline data was calculated (7 available, 2 approximated and in 4 the mean group data was calculated after stratification by smoking and gender).

Of the maximum elevations observed in the 13 patients with 16 episodes of treatment with inhibitors, 81% (13/16) of the patients did not need any relevant changes and 19% (3/16) patients will need half the clozapine dose, according to peak data from the treatment period with inhibitors. The footnotes of Supplementary Table S2 note that in Patients 10, 24 and 25 the inhibitor dose appeared to be important.

## **SUPPLEMENTARY DISCUSSION**

### **Clinical Relevance of Infections Compared with Inhibitors in Individual Patients**

When focusing at the patient level, infections appeared much more clinically relevant in the contamination of clozapine TDM than did treatment with inhibitors. We considered 11% of the infection periods to have no apparent clinically relevant effect on TDM vs. 81% that corresponded with co-prescription of inhibitors. Approximately halving the clozapine dose would be advisable in 61% of the infection episodes vs. 19% of the inhibitor periods. Using approximately one-third the clozapine dose would be advisable in 28% of the infection episodes vs. none of the inhibitor periods.

### **Types of Infections/inflammations**

The most important infections/inflammations were viral respiratory infections. The available TDM data suggested that when there was no leukocytosis some patients might not need clozapine dose changes while others need half the dose. When the viral infection was associated with leukocytosis and probably caused by the influenza virus, the clozapine dose corrections needed would reduce the dose to somewhere between 1/3 and 3/4.

Pneumonia was the second most frequent cause with two cases. The potential lethality of pneumonia in clozapine patients was demonstrated by one patient (Patient 10) who needed to be transferred to a medical hospital for 3 months.

### **Types of Inhibitors**

Our retrospective review only found 3 potential inhibitors, imipramine, perphenazine, and sertraline, in 16 episodes of treatment with inhibitors in 13 patients. In most cases the available TDM data suggested that effects were not clinically relevant, but in some patients sertraline in high doses or the combination of sertraline and perphenazine was a clinically relevant inhibitor of clozapine metabolism, which is compatible with prior literature on high doses of these compounds [S3, S4].

## **Limitations**

The most important limitation is described in the text and its data reflects the clinical practice of one specific hospital (Beijing Anding Hospital) located in one specific country (China). Replication will require another hospital using repeated clozapine TDMs in a large sample of patients.

The second limitation is its retrospective nature. The patients were prospectively treated by clinicians who used TDM for clinical purposes, but we collected the data in a retrospective way. Based on prior cases [7, 8], clinicians learned to pay attention to clozapine TDM during infections and consider dose reductions. White blood cell counts (WBCs) were studied and sometimes during the infections c-reactive protein (CRP) levels were available [S5]. Infections were clinically diagnosed with no identification of the microbiological agent. In hindsight, we would have liked to have had CRPs and close fever monitoring in all patients and more TDM during infections/inflammations in order to have more chances to catch peak TDMs. We are planning to seek funding for a prospective study in which we will support treating psychiatrists with pharmacists to help remind psychiatrists to order CRP and TDM as soon as signs/symptoms of infection/inflammation appear. We cannot rule out that a prospective study including more in situ education for treating psychiatrists may provide an even higher percentage than 2-3%. The infections/inflammations totaled 482 days with 46 trough steady-state TDMs (and a few not in steady state). We probably missed some of the TDM peaks during infections.

The third limitation is that the TDM data was collected for clinical purposes and not for research. The first author reviewed each level in order to verify steady-state concentrations ( $\geq 5$  days or  $\geq 5$  clozapine half-lives after the last dose). All samples were trough collections (early morning before meds and  $>12$

hours since the last dose). Three of the 134 patients had to be excluded due to lack of steady-state concentrations. In our prior case reports [7, 8], the peak of clozapine TDM during infection was not a steady-state concentration because for clinical reasons it was not possible to keep the doses stable. Eliminating them will undercalculate the effects of infection. Therefore, we calculated the mean dose of the last 5 days before the blood collection to approximate the clozapine concentration-to-dose (C/D) ratio. The peak clozapine C/D ratio was used to calculate the dose correction factor needed to compensate for the inhibition of clozapine metabolism. The clozapine C/D ratio without infection was divided by the clozapine C/D ratio during infection. If the value is close to 1, it was considered not relevant. Similar procedures were performed to calculate the effects of co-prescription of inhibitors in order to provide a comparison of the clinical relevance of infections.

The fourth limitation is that the medical records do not provide details about the presence or absence of signs of clozapine toxicity.

The fifth limitation is that this study reflect inpatient practice. Future studies will also need to be conducted with clozapine outpatients, but it will be more difficult to establish clozapine treatment adherence by patients, which may make it difficult to interpret clozapine levels. Lack of adherence is a major problem in the interpretation of clozapine TDM in outpatients [S6].

The sixth limitation is that smoking was not controlled and is frequent among male patients but rare among females. The hospital staff does not control smoking and there was no information on the number of daily cigarettes smoked by each patient who was a smoker. Our experience with a well-controlled double-blind clozapine study in the United States (US), in which adherence was closely supervised and caffeine beverages were not available [S7, S8] is that the major reason for TDM variability is the variation in smoking in the patients who smoke [S9]. In that US hospital, each patient was given the same number of cigarettes every day by the staff, but the staff knew that patients traded cigarettes. In that study, we had the luxury of access to serum cotinine levels [S9] and we could observe that some smokers occasionally have greater diminutions in cotinine levels compatible with decrease in smoking that were associated with

increases in the clozapine C/D ratio. In this study in Beijing Anding Hospital, 4 of the 16 patients (Patients 1, 3, 4 and 6) with infections were smokers. It is possible that during respiratory infections they may have decreased their smoking and this may be associated with some loss of CYP1A2 induction and increases in clozapine C/D ratios. It is believed that induction disappears 2-4 weeks after complete smoking cessation [S10]. Patient 1 had a skin abscess that lasted 15 days; we do not think it is likely that patient decreased smoking due to a skin abscess. However, even if he stopped smoking completely, the infection did not last long enough to see contamination of the increase in his clozapine C/D ratio due to smoking cessation. Supplementary Table S3 indicates that the peak clozapine C/D ratio was on day 1 of the infection, too early to see effects from the loss of induction due to smoking cessation. Patient 3 had a respiratory viral infection with fever that lasted 18 days, so some contamination in his clozapine C/D ratio due to smoking cessation cannot be completely ruled out in the last days of the infection. Supplementary Table S5 indicates that the peak clozapine C/D ratio occurred on day 10 of the infection, so it appears to be too early to see effects from the loss of induction due to smoking cessation. Patient 4 had a respiratory viral infection without leukocytosis that lasted 28 days, so some contamination in her clozapine C/D ratios through decreased smoking cannot be completely ruled out, but the increase in the C/D ratio (dose correction factor 0.70) was very mild, reflecting the mild infection. Supplementary Table S6 indicates that the peak clozapine C/D ratio was on day 12 of the infection (day 197; the infection started on day 185) so it appears to be too early to see the effects of loss of induction due to smoking cessation. Patient 6 had a respiratory viral infection without leukocytosis that lasted 33 days, so some contamination in her clozapine C/D ratio through decreased smoking cannot be completely ruled out at the end of the infection. Supplementary Table S8 indicates that the peak clozapine C/D ratio was on day 4 of the infection (day 50; the infection started on day 46) so it is too early to see effects from the loss of induction due to smoking cessation. In summary, even if the four patients stopped smoking completely the effects of loss of induction were absent or minimal. Ideally, in future studies, we would want to have access to serum cotinine levels to explore the effects of smoking variations on clozapine C/D ratios. However, we do not think that we could convince the hospital

administration to cover the cost of developing a chromatography assay to measure cotinine levels. We are not aware of any hospital in the world using routine serum cotinine levels in clinical practice. Smoking and caffeine intake variations have clinically relevant effects on clozapine metabolism. Ideally, having access to serum cotinine and caffeine (and paraxanthine) levels may be important for managing clozapine patients in in- and out-patient settings but, unfortunately, these determinations are not currently considered part of clinical practice and these assays are mainly limited to research laboratories.

### **Practical Recommendations for the Management of Infections in Clozapine Patients**

Based on the literature [9] and this new study, in order to help clinicians managing clozapine patients, we have developed 3 sets of recommendations regarding infections: 1) prevention, 2) during the infection, and 3) after the infection.

For prevention, we recommend that psychiatrists using clozapine should educate their outpatients and families to be attentive to signs or symptoms of infection/inflammation or fever and to contact them immediately to prevent clozapine intoxications. To prevent pneumonia, psychiatrists should prescribe the lowest possible efficacious CLO Ds in each patient to decrease the risk for hypersalivation, sedation and swallowing disturbances. Hypersalivation should be managed with pharmacological and non-pharmacological interventions when required [S11].

Once an infection has developed, the psychiatrist should order a CRP level. When fever and/or CRP elevations develop, the psychiatrist should consider immediately halving the clozapine dose and monitor for signs of clozapine intoxication. If the clinician has access to clozapine TDM when the lab returns the clozapine TDM, it will be possible to better adjust the dosage. If signs of clozapine intoxication are already present it may be safer to stop clozapine for 2-3 days or until the TDM report arrives. A severe infection, such as pneumonia combined with a clozapine intoxication, appears to be a highly lethal combination [9].

After the infection/inflammation has resolved and the CRP has normalized, we recommend going back to the prior clozapine dose, as long as it was a safe and efficacious dosage.



## References

- S1. Spina E, Hiemke C, de Leon J: Assessing drug-drug interactions through therapeutic drug monitoring when administering oral second-generation antipsychotics. *Expert Opin Drug Metab Toxicol* 2016;12:407-422.
- S2. Shakeri-Nejad K, Stahlmann R: Drug interactions during therapy with three major groups of antimicrobial agents. *Expert Opin Pharmacother* 2006;7:639-651.
- S3. Pinninti NR, de Leon J: Interaction of sertraline with clozapine. *J Clin Psychopharmacol* 1997;17:119-120.
- S4. Cooke C, de Leon J: Adding other antipsychotics to clozapine. *J Clin Psychiatry* 1999;60:710.
- S5. Pfuhlmann B, Hiemke C, Unterecker S, Burger R, Schmidtke A, Riederer P, Deckert J, Jabs B: Toxic clozapine serum levels during inflammatory reactions. *J Clin Psychopharmacol* 2009;29:392-394.
- S6. Stieffenhofer V, Saglam H, Schmidtman I, Silver H, Hiemke C, Konrad A: Clozapine plasma level monitoring for prediction of rehospitalization schizophrenic outpatients. *Pharmacopsychiatry* 2011;44:55-59.
- S7. Simpson GM, Josiassen RC, Stanilla JK, de Leon J, Nair C, Abraham G, Odom-White A, Turner RM: Double-blind study of clozapine dose response in chronic schizophrenia. *Am J Psychiatry* 1999;156:1744-1750.
- S8. Diaz FJ, Josiassen RC, de Leon J: The effect of body weight changes on total plasma clozapine concentrations determined by applying a statistical model to the data from a double-blind trial. *J Clin Psychopharmacol* 2018;38:442-446.
- S9. Diaz FJ, de Leon J, Josiassen RC, Cooper TB, Simpson GM: Plasma clozapine concentration coefficients of variation in a long-term study. *Schizophr Res* 2005;72:131-135.
- S9. de Leon J, Diaz FJ, Josiassen RC, Cooper TB, Simpson GM: Does clozapine decrease smoking? *Prog Neuropsychopharmacol Biol Psychiatry* 2005;29:757-762.

- S10. Sabaawi M, Singh NN, de Leon J: Guidelines for the use of clozapine in individuals with developmental disabilities. *Res Dev Disabil* 2006;27:309-336.
- S11. Sagy R, Weizman A, Katz N: Pharmacological and behavioral management of some often-overlooked clozapine-induced side effects. *Int Clin Psychopharmacol* 2014;29:313-317.

**SUPPLEMENTARY TABLE S1. Sample description: including total sample and patients with infections and/or co-prescription of inhibitors**

|                                                                                                        | Patients         |           |              |        |        |  | Duration (days)   |                       |                       | Number of ss TDM samples |                     |                       |
|--------------------------------------------------------------------------------------------------------|------------------|-----------|--------------|--------|--------|--|-------------------|-----------------------|-----------------------|--------------------------|---------------------|-----------------------|
|                                                                                                        | N                | Age       | % (♂ s ♀ s)  | ♂ ns   | ♀ ns   |  | Total             | Mean                  | mean % <sup>a</sup>   | Total                    | Mean                | % <sup>b</sup>        |
| Total                                                                                                  | 131 <sup>c</sup> | 43.7±14.5 | 17% 4%       | 28%    | 51%    |  | 24789             | 189                   |                       | 1384                     | 10.5                |                       |
|                                                                                                        |                  |           | 22/129 5/131 | 37/131 | 67/131 |  |                   | (9-896) <sup>d</sup>  |                       |                          | (1-50) <sup>d</sup> |                       |
| <b>2% (482<sup>4</sup>/24789) of clozapine-days and 3% (45<sup>4</sup>/1384) of ss TDM samples</b>     |                  |           |              |        |        |  |                   |                       |                       |                          |                     |                       |
| Infection                                                                                              | 16               | 38.4±14.0 | 13% 6%       | 68%    | 13%    |  | 482 <sup>e</sup>  | 30                    | 30%                   | 46 <sup>e</sup>          | 2.8                 | 39%                   |
|                                                                                                        |                  |           | 2/16 1/16    | 11/16  | 2/16   |  |                   | (2-76) <sup>d</sup>   | (3-100%) <sup>d</sup> |                          | (0-7) <sup>d</sup>  | (0-100%) <sup>d</sup> |
| <b>12% (2888<sup>4</sup>/24789) of clozapine-days and 12% (171<sup>4</sup>/1384) of ss TDM samples</b> |                  |           |              |        |        |  |                   |                       |                       |                          |                     |                       |
| Inhibitor                                                                                              | 13               | 44.8±13.4 | 23%          | 23%    | 54%    |  | 2888 <sup>e</sup> | 222                   | 67%                   | 172 <sup>e</sup>         | 13                  | 73%                   |
|                                                                                                        |                  |           | 3/13         | 3/13   | 7/13   |  |                   | (12-735) <sup>d</sup> | (22-100) <sup>d</sup> |                          | (1-37) <sup>d</sup> | (15-100) <sup>d</sup> |

ss, steady state; TDM, therapeutic drug monitoring.

<sup>a</sup>The percentages of days each patient's TDM samples were contaminated by inflammation or inhibitor were calculated. The table provides the mean and ranges.

<sup>b</sup>The percentages of numbers of ss TDM samples contaminated by inflammation or inhibitor were calculated for each patient. The table provides the mean and ranges.

<sup>c</sup>The 131 inpatients included 104 who never had an infection or inhibitor, 14 who had at least one infection during their admission, 2 who had an infection and were also treated with an inhibitor sometime during the admission and 11 who were treated with an inhibitor sometime during the admission but never were diagnosed with an infection.

<sup>d</sup>Ranges.

<sup>e</sup>Two patients (patients 2 and 10) had both infection and inhibitor co-prescription. Of the total of 24,380 days, there were 13 days in which infection and inhibition co-prescription overlapped. From 1358 ss TDM samples, 1 sample was influenced by the overlap of infection and inhibition co-prescription.

**SUPPLEMENTARY TABLE S2. Description of 13 patients with inhibitors including the duration and type of inhibitor and dose correction factors**

| Patient number<br>Age (yr) sex smoking | Inhibitor<br>mg/day           | Time<br>Inhibitor/total;% | Clozapine C/D ratio (ng/ml per mg/day) |                        |                                        |
|----------------------------------------|-------------------------------|---------------------------|----------------------------------------|------------------------|----------------------------------------|
|                                        |                               |                           | No inhibitor<br>mean; N                | During<br>mean; N      | Dose correction<br>factor <sup>a</sup> |
| 2: 55 ♀ non-smoker                     | sertraline 150                | 735/896;82%               | 2.53;N=13                              | 2.34;N=26              | not relevant                           |
| 10: 39 ♂ non-smoker                    | any inhibitor                 | 81/154;53%                | (1.62 no ss; N=2) <sup>b</sup>         |                        |                                        |
|                                        | sertraline 150                |                           |                                        | 1.70;N=5               | not relevant                           |
|                                        | +perphenazine 8               |                           |                                        | 1.53;N=1               | not relevant                           |
|                                        | +perphenazine 12 <sup>c</sup> |                           |                                        | 2.36;N=1 <sup>c</sup>  | 0.69 may be relevant                   |
| 16:62 ♀ non-smoker                     | any sertraline dose           | 36/36;100%                |                                        |                        |                                        |
|                                        | sertraline <150               | 22/36; 61%                |                                        | 2.29;N=3               | not relevant                           |
|                                        | ≥ 150                         | 14 /36; 39%               | 2.11 ♀ non-smokers <sup>d</sup>        | 2.52;N=2               | not relevant (vs group mean)           |
| 17:51 ♀ non-smoker                     | sertraline 50                 | 512/512 100%              | 2.11 ♀ non-smokers <sup>d</sup>        | 1.97;N=32              | not relevant (vs group mean)           |
| 18:49 ♂ non-smoker                     | sertraline 150                | 339/339;100%              | 1.71 ♂ non-smokers <sup>d</sup>        | 2.01; N=23             | not relevant (vs group mean)           |
| 19:41 ♂ smoker                         | imipramine 25-50              | 213/521;40%               | 1.14;N=17                              | 0.81; N=3              | not relevant                           |
| 20:62 ♂ smoker                         | sertraline 50                 | 99/359;28%                | 2.10; N=27                             | 2.53;N=11              | not relevant                           |
| 21:33 ♀ non-smoker                     | sertraline 50                 | 357/357;100%              | 2.11 ♀ non-smokers <sup>d</sup>        | 1.81;N=27              | not relevant (vs group mean)           |
| 22:31 ♀ non-smoker                     | sertraline 25-50              | 381/381;100%              | 2.11                                   | 2.59; N=18             | not relevant (vs group mean)           |
| 23:29 ♂ non-smoker                     | perphenazine 4-40             | 39/80;49%                 | 1.46; N=2                              | 1.41; N=5              | not relevant                           |
| 24:21 ♂ smoker                         | sertraline 50-150             | 20/54;37%                 | 0.79; N=1                              | 1.68; N=3              | 0.54 relevant                          |
| 25:51 ♀ non-smoker                     | perphenazine 12-32            | 12/54;22%                 | 2.66; N=2                              | 5.56; N=1 <sup>e</sup> | 0.48 relevant                          |
| 26:58 ♀ non-smoker                     | sertraline 50-100             | 46/73;63%                 | (2.55; N=2) <sup>b</sup>               | 2.43; N=4              | not relevant                           |

C/D, concentration-to-dose; ss, steady state.

<sup>a</sup>Dose correction factor is multiplied by the patient's clozapine dose to control for the effect of the inhibitor on clozapine concentrations. It is calculated by dividing clozapine C/D ratio when there is no inhibitor by clozapine C/D ratio when there is no inhibitor. If the value is close to 1, it is described as not relevant.

<sup>b</sup>These patients had no ss clozapine C/D ratio in the absence of the inhibitors. They had 2 values with no inhibitor that were not in ss. We approximated the calculation of the clozapine C/D ratio by using the mean dose of the last 5 days.

<sup>c</sup>Supplementary Table S12 describes the first value of clozapine C/D ratio on sertraline 150 mg/day and perphenazine 12 mg/day as 1.64, but it might not have been in steady state due to perphenazine inhibition. Supplementary Table S2 (shown above) describes the peak value 13 days after perphenazine was increased to 12 mg/day, which is likely to provide ss after the inhibition by perphenazine.

<sup>d</sup>These patients had no clozapine C/D ratio in the absence of inhibitors, so we compared their clozapine C/D ratios with the mean from the group with the same sex and smoking status.

<sup>e</sup>On day 12 of the clozapine treatment, a concentration contaminated by treatment with perphenazine was collected. The perphenazine dose was 16 mg/day on that day but its inhibitory effects were not in ss and the patient took higher doses of 22 mg/day on day 5, 26 mg/day on day 4, and 32 mg/day on day 1. We calculated the mean perphenazine dose over the prior 7 days, which was 26 mg/day.

**SUPPLEMENTARY TABLE S3. Patient 1: Changes in clozapine steady-state TDM, clozapine dosages and WBC before, during and after skin abscess with leukocytosis**

| Day             | Infection   | Clozapine dose<br>(mg/day) | Clozapine concentration<br>(ng/ml) | Norclozapine concentration<br>(ng/ml) | Total concentration<br>(ng/ml) | Clozapine C/D ratio<br>(ng/ml per mg/day) | Total C/D ratio<br>(ng/ml per mg/day) | CRP<br>mg/dL<br>0.0-0.8 | WBC count<br>(x 10 <sup>9</sup> cell/L)<br>4.0-10.0 |
|-----------------|-------------|----------------------------|------------------------------------|---------------------------------------|--------------------------------|-------------------------------------------|---------------------------------------|-------------------------|-----------------------------------------------------|
| 1               | Before      | 200                        |                                    |                                       |                                |                                           |                                       |                         |                                                     |
| 17              | Before      | 200                        | 210.0                              | 122.0                                 | 332.0                          | 1.05                                      | 1.66                                  |                         |                                                     |
| 35              | Before      | 200                        | 287.5                              | 162.3                                 | 449.8                          | 1.44                                      | 2.25                                  |                         |                                                     |
| 52 <sup>a</sup> | Infection   | 200                        | 516.6                              | 208.4                                 | 725.0                          | 2.58                                      | 3.63                                  | 1.76                    | 12.6                                                |
| 65 <sup>b</sup> | 1 day after | 200                        | 327.9                              | 218.4                                 | 546.3                          | 1.64                                      | 2.73                                  |                         |                                                     |
| 70              | After       | 200                        | 280.3                              | 147.7                                 | 428.0                          | 1.40                                      | 2.14                                  |                         |                                                     |
| 77              | After       | 200                        | 281.4                              | 169.3                                 | 450.7                          | 1.41                                      | 2.25                                  |                         |                                                     |
| 80              | After       | 200                        | 300.0                              | 185.5                                 | 485.8                          | 1.50                                      | 2.43                                  |                         |                                                     |
| 94              | After       | 200                        | 302.8                              | 215.2                                 | 518.0                          | 1.51                                      | 2.59                                  |                         |                                                     |
| 148             | After       | 200                        | 334.7                              | 157.8                                 | 492.5                          | 1.67                                      | 2.46                                  |                         |                                                     |
| 157             | After       | 200                        | 299.8                              | 175.9                                 | 475.7                          | 1.50                                      | 2.38                                  |                         |                                                     |
| 163             | After       | 200                        | 300.8                              | 157.1                                 | 457.9                          | 1.50                                      | 2.29                                  |                         |                                                     |
| 174             | After       | 200                        | 343.5                              | 157.8                                 | 501.3                          | 1.72                                      | 2.51                                  |                         |                                                     |
| 182             | After       | 200                        | 336.2                              | 172.7                                 | 508.9                          | 1.68                                      | 2.54                                  |                         |                                                     |
| 189             | After       | 200                        | 363.6                              | 180.4                                 | 544.0                          | 1.82                                      | 2.72                                  |                         |                                                     |
| 197             | After       | 200                        | 290.0                              | 143.3                                 | 433.3                          | 1.45                                      | 2.17                                  |                         |                                                     |
| 204             | After       | 200                        | 342.1                              | 172.9                                 | 515.0                          | 1.71                                      | 2.58                                  |                         |                                                     |
| 211             | After       | 200                        | 371.5                              | 178.8                                 | 550.3                          | 1.86                                      | 2.75                                  |                         |                                                     |
| 217             | After       | 200                        | 400.3                              | 170.0                                 | 570.3                          | 2.00                                      | 2.85                                  |                         |                                                     |
| 225             | After       | 200                        | 227.8                              | 141.4                                 | 369.2                          | 1.14                                      | 1.85                                  |                         |                                                     |
| 232             | After       | 200                        | 274.0                              | 131.0                                 | 405.0                          | 1.37                                      | 2.03                                  |                         |                                                     |
| 239             | After       | 200                        | 304.3                              | 145.9                                 | 450.2                          | 1.52                                      | 2.25                                  |                         |                                                     |
| 253             | After       | 200                        | 343.7                              | 175.2                                 | 518.9                          | 1.72                                      | 2.59                                  |                         |                                                     |
| 260             | After       | 200                        | 387.9                              | 171.8                                 | 559.7                          | 1.94                                      | 2.80                                  |                         |                                                     |
| 271             | After       | 200                        | 280.9                              | 143.8                                 | 424.7                          | 1.40                                      | 2.12                                  |                         |                                                     |
| 280             | After       | 200                        | 201.8                              | 138.2                                 | 340.0                          | 1.01                                      | 1.70                                  |                         |                                                     |
| 281             | After       | 250                        |                                    |                                       |                                |                                           |                                       |                         |                                                     |
| 288             | After       | 250                        | 387.3                              | 247.9                                 | 635.2                          | 1.55                                      | 2.54                                  |                         |                                                     |
| 295             | After       | 250                        | 399.1                              | 239.1                                 | 638.2                          | 1.60                                      | 2.55                                  |                         |                                                     |
| 302             | After       | 250                        | 307.4                              | 207.4                                 | 514.8                          | 1.23                                      | 2.06                                  |                         |                                                     |
| 309             | After       | 250                        | 326.7                              | 199.8                                 | 526.5                          | 1.31                                      | 2.11                                  |                         |                                                     |

|     |       |     |       |       |       |      |      |
|-----|-------|-----|-------|-------|-------|------|------|
| 316 | After | 250 | 429.2 | 280.6 | 709.8 | 1.72 | 2.84 |
| 322 | After | 250 | 342.5 | 226.9 | 569.4 | 1.37 | 2.28 |

---

C/D, concentration-to-dose; CRP, c-reactive protein; TDM, therapeutic drug monitoring; WBC, white blood cell count. **The TDM that provided the peak results is in orange font. WBC and CRP abnormal values are in blue font.**

<sup>a</sup>The topical treatment was benzalkonium with chloride and fusidic acid cream.

<sup>b</sup>This value was not used in calculating the mean of C/D ratios when there was no infection. The patient was recovering from the skin abscess.

**SUPPLEMENTARY TABLE S4. Patient 2: Changes in clozapine steady-state TDM, clozapine dosages, sertraline dosage and WBC before, during and after four viral respiratory infections**

| Day                | Influenza                 | Clozapine dose<br>(mg/day) | Clozapine concentration<br>(ng/ml) | Norclozapine concentration<br>(ng/ml) | Total concentration<br>(ng/ml) | Clozapine C/D ratio<br>(ng/ml per mg/day) | Total C/D ratio<br>(ng/ml per mg/day) | Sertraline<br>(mg/day) | WBC count<br>(x 10 <sup>9</sup> cell/L)<br>4.0-10.0 |
|--------------------|---------------------------|----------------------------|------------------------------------|---------------------------------------|--------------------------------|-------------------------------------------|---------------------------------------|------------------------|-----------------------------------------------------|
| 1 <sup>a</sup>     | Before                    | 225                        |                                    |                                       |                                |                                           |                                       | 150                    |                                                     |
| 13 <sup>a</sup>    | Before                    | 225                        |                                    |                                       |                                |                                           |                                       | 150                    | 8.3                                                 |
| 32 <sup>a</sup>    | Before                    | 225                        | 685.0                              | 283.3                                 | 968.3                          | 3.04                                      | 4.30                                  | 150                    | 7.4                                                 |
| 53 <sup>a</sup>    | Before                    | 225                        |                                    |                                       |                                |                                           |                                       | 150                    | 7.0                                                 |
| 54 <sup>a,b</sup>  | 1 <sup>st</sup> infection | 225                        |                                    |                                       |                                |                                           |                                       | 150                    | 7.0                                                 |
| 57 <sup>a,b</sup>  | 1 <sup>st</sup> infection | 225                        | 939.1                              | 345.1                                 | 1284.2                         | 4.17                                      | 5.71                                  | 150                    | 5.6                                                 |
| 68 <sup>a,b</sup>  | 1 <sup>st</sup> infection | 225                        |                                    |                                       |                                |                                           |                                       | 150                    |                                                     |
| 69 <sup>a</sup>    | After                     | 150                        |                                    |                                       |                                |                                           |                                       | 100                    |                                                     |
| 78 <sup>a</sup>    | After                     | 150                        |                                    |                                       |                                |                                           |                                       | 100                    |                                                     |
| 79 <sup>a</sup>    | After                     | 175                        |                                    |                                       |                                |                                           |                                       | 150                    |                                                     |
| 83 <sup>a</sup>    | After                     | 225                        |                                    |                                       |                                |                                           |                                       | 150                    |                                                     |
| 105 <sup>a</sup>   | After                     | 225                        | 624.6                              | 295.5                                 | 920.1                          | 2.78                                      | 4.09                                  | 150                    |                                                     |
| 119 <sup>a</sup>   | After                     | 225                        | 550.7                              | 234.5                                 | 785.2                          | 2.45                                      | 3.49                                  | 150                    |                                                     |
| 175 <sup>a</sup>   | After                     | 225                        | 630.1                              | 213.2                                 | 843.3                          | 2.80                                      | 3.75                                  | 150                    |                                                     |
| 216 <sup>a</sup>   | After                     | 225                        | 670.8                              | 245.1                                 | 915.9                          | 2.98                                      | 4.07                                  | 150                    |                                                     |
| 244 <sup>a</sup>   | After                     | 225                        | 549.5                              | 188.5                                 | 738.0                          | 2.44                                      | 3.28                                  | 150                    |                                                     |
| 322 <sup>a</sup>   | After                     | 225                        | 631.6                              | 250.7                                 | 882.3                          | 2.81                                      | 3.92                                  | 150                    |                                                     |
| 343 <sup>a</sup>   | After                     | 225                        | 431.6                              | 199.6                                 | 631.2                          | 1.92                                      | 2.81                                  | 150                    |                                                     |
| 378 <sup>c</sup>   | After                     | 225                        |                                    |                                       |                                |                                           |                                       | 150                    |                                                     |
| 379 <sup>c</sup>   | After                     | 225                        | 570.0                              | 242.4                                 | 812.4                          | 2.53                                      | 3.61                                  | 150                    | 8.2                                                 |
| 394 <sup>c,d</sup> | 2 <sup>nd</sup> infection | 225                        |                                    |                                       |                                |                                           |                                       | 150                    | 12.2                                                |
| 395 <sup>c,d</sup> | 2 <sup>nd</sup> infection | 225                        |                                    |                                       |                                |                                           |                                       | 150                    | 7.7                                                 |
| 406 <sup>c,d</sup> | 2 <sup>nd</sup> infection | 225                        |                                    |                                       |                                |                                           |                                       | 150                    | 7.7                                                 |
| 407 <sup>c</sup>   | After                     | 225                        |                                    |                                       |                                |                                           |                                       | 150                    |                                                     |
| 411 <sup>c</sup>   | After                     | 225                        |                                    |                                       |                                |                                           |                                       | 150                    | 8.9                                                 |
| 481 <sup>c</sup>   | After                     | 225                        |                                    |                                       |                                |                                           |                                       | 150                    | 9.4                                                 |
| 495 <sup>c</sup>   | After                     | 225                        |                                    |                                       |                                |                                           |                                       | 150                    | 9.0                                                 |
| 496 <sup>c,b</sup> | 3 <sup>rd</sup> infection | 225                        |                                    |                                       |                                |                                           |                                       | 150                    |                                                     |
| 498 <sup>c,b</sup> | 3 <sup>rd</sup> infection | 225                        |                                    |                                       |                                |                                           |                                       | 150                    |                                                     |
| 499 <sup>c</sup>   | After                     | 225                        |                                    |                                       |                                |                                           |                                       | 150                    |                                                     |
| 510 <sup>c</sup>   | After                     | 225                        | 551.1                              | 231.7                                 | 782.8                          | 2.45                                      | 3.48                                  | 150                    | 9.2                                                 |
| 524 <sup>c</sup>   | After                     | 225                        | 420.2                              | 186.7                                 | 606.9                          | 1.87                                      | 2.70                                  | 150                    |                                                     |

|                    |                           |     |        |        |        |      |      |     |     |
|--------------------|---------------------------|-----|--------|--------|--------|------|------|-----|-----|
| 538 <sup>c</sup>   | After                     | 225 | 494.2  | 204.3  | 698.5  | 2.20 | 3.10 | 150 |     |
| 552 <sup>c</sup>   | After                     | 225 | 507.12 | 195.9  | 703.1  | 2.25 | 3.12 | 150 |     |
| 567 <sup>c</sup>   | After                     | 225 | 380.2  | 152.8  | 533.0  | 1.69 | 2.37 | 150 |     |
| 579 <sup>c</sup>   | After                     | 225 | 518.9  | 192.9  | 711.9  | 2.31 | 3.16 | 150 |     |
| 594 <sup>c</sup>   | After                     | 225 | 489.6  | 192.8  | 682.4  | 2.18 | 3.03 | 150 |     |
| 608 <sup>c</sup>   | After                     | 225 | 574.1  | 169.9  | 744.0  | 2.55 | 3.31 | 150 |     |
| 623 <sup>c</sup>   | After                     | 225 | 478.9  | 173.4  | 652.3  | 2.13 | 2.90 | 150 |     |
| 637 <sup>c</sup>   | After                     | 225 | 569.5  | 183.8  | 753.3  | 2.53 | 3.35 | 150 |     |
| 651 <sup>c</sup>   | After                     | 225 | 512.5  | 162.1  | 674.6  | 2.28 | 3.00 | 150 |     |
| 665 <sup>c</sup>   | After                     | 225 | 484.6  | 181.1  | 665.7  | 2.15 | 2.96 | 150 |     |
| 678 <sup>c</sup>   | After                     | 225 | 383.9  | 156.1  | 540.0  | 1.71 | 2.40 | 150 |     |
| 693 <sup>c</sup>   | After                     | 225 | 531.2  | 192.0  | 732.2  | 2.36 | 3.21 | 150 |     |
| 708 <sup>c</sup>   | After                     | 225 | 484.5  | 144.3  | 628.8  | 2.15 | 3.79 | 150 |     |
| 721 <sup>c</sup>   | After                     | 225 | 461.2  | 192.9  | 654.1  | 2.05 | 2.91 | 150 |     |
| 735 <sup>c</sup>   | After                     | 225 | 518.6  | 136.9  | 655.5  | 2.30 | 2.91 | 150 | 8.5 |
| 736 <sup>c</sup>   | After                     | 225 |        |        |        |      |      | 0   |     |
| 748 <sup>c</sup>   | After                     | 225 | 529.3  | 172.3  | 701.6  | 2.35 | 3.12 | 0   |     |
| 749 <sup>c</sup>   | After                     | 225 |        |        |        |      |      | 0   | 8.2 |
| 755 <sup>c</sup>   | After                     | 250 |        |        |        |      |      |     |     |
| 762 <sup>c,e</sup> | 4 <sup>th</sup> infection | 250 |        |        |        |      |      |     |     |
| 763 <sup>c,e</sup> | 4 <sup>th</sup> infection | 250 | 592.7  | 193.3  | 786.0  | 2.37 | 3.14 | 0   | 9.0 |
| 770 <sup>c,e</sup> | 4 <sup>th</sup> infection | 250 |        |        |        |      |      |     |     |
| 771 <sup>c</sup>   | After                     | 250 |        |        |        |      |      |     |     |
| 774 <sup>c</sup>   | After                     | 250 | 531.2  | 233.6  | 764.8  | 2.12 | 3.06 | 0   | 8.0 |
| 791 <sup>c</sup>   | After                     | 250 | 657.6  | 214.8  | 872.4  | 2.63 | 3.49 | 0   | 6.7 |
| 804 <sup>c</sup>   | After                     | 250 | 551.3  | 201.8  | 753.1  | 2.21 | 3.01 | 0   |     |
| 819 <sup>c</sup>   | After                     | 250 | 636.5  | 251.2  | 887.7  | 2.55 | 3.55 | 0   |     |
| 825 <sup>c</sup>   | After                     | 250 | 487.5  | 205.7  | 693.2  | 1.95 | 2.77 | 0   |     |
| 847 <sup>c</sup>   | After                     | 250 | 604.2  | 249.2  | 853.4  | 2.42 | 3.41 | 0   |     |
| 861 <sup>c</sup>   | After                     | 250 | 672.6  | 258.7  | 931.3  | 2.69 | 3.73 | 0   |     |
| 874 <sup>c</sup>   | After                     | 250 | 812.5  | 301.3  | 1113.8 | 3.25 | 4.46 | 0   |     |
| 888 <sup>c</sup>   | After                     | 250 | 731.4  | 262.3  | 993.5  | 2.93 | 3.97 | 0   |     |
| 903 <sup>c</sup>   | After                     | 250 | 755.9  | 312.0  | 1067.9 | 3.02 | 4.27 | 0   |     |
| 917 <sup>c</sup>   | After                     | 250 | 697.4  | 247.53 | 944.9  | 2.79 | 3.78 | 0   |     |
| 930 <sup>c</sup>   | After                     | 250 | 489.9  | 194.3  | 684.2  | 1.96 | 2.74 | 0   |     |

C/D, concentration-to-dose; TDM, therapeutic drug monitoring; WBC, white blood cell count. **The TDM that provided the peak results is in orange font. WBC abnormal values are in blue font.**



<sup>a</sup>The first admission lasted 343 days.

<sup>b</sup>The patient was treated with Chinese treatments for influenza called Jing Hua Qing Gan Ke Li and Qing Re Jie Du Ke Li. The first episode of infection lasted 13 days. The third episode of infection lasted 3 days.

<sup>c</sup>The second admission lasted 553 days.

<sup>d</sup>The patient was treated with a Chinese treatment for influenza called Jing Hua Qing Gan Ke Li. The second episode of infection lasted 13 days.

<sup>e</sup>The patient was treated with a Chinese treatment for influenza called Fu Fang Xuan Zhu Li. The fourth episode of infection lasted 9 days.

**SUPPLEMENTARY TABLE S5. Patient 3: Changes in clozapine steady-state TDM, clozapine dosages and WBC during and after viral respiratory infection with leukocytosis and fever (possibly influenza)**

| Day             | Respiratory viral infection | Clozapine dose (mg/day) | Clozapine concentration (ng/ml) | Norclozapine concentration (ng/ml) | Total concentration (ng/ml) | Clozapine C/D ratio (ng/ml per mg/day) | Total C/D ratio (ng/ml per mg/day) | Temperature °C | WBC count (x 10 <sup>9</sup> cell/L)<br>4.0-10.0 |
|-----------------|-----------------------------|-------------------------|---------------------------------|------------------------------------|-----------------------------|----------------------------------------|------------------------------------|----------------|--------------------------------------------------|
| 1 <sup>a</sup>  | Infection                   | 75                      |                                 |                                    |                             |                                        |                                    | 37.5           | <b>18.0</b>                                      |
| 8 <sup>a</sup>  | Infection                   | 75                      |                                 |                                    |                             |                                        |                                    | <b>38.5</b>    | 8.6                                              |
| 9 <sup>a</sup>  | Infection                   | 75                      |                                 |                                    |                             |                                        |                                    | <b>38.0</b>    |                                                  |
| 10 <sup>a</sup> | Infection                   | 75                      | <b>471.8</b>                    | <b>58.5</b>                        | <b>510.3</b>                | <b>6.29</b>                            | <b>7.07</b>                        |                |                                                  |
| 16 <sup>a</sup> | Recovering                  | 75                      | 125.7                           | 50.9                               | 176.6 <sup>b</sup>          | 1.68                                   | 2.35                               |                |                                                  |
| 18 <sup>a</sup> | Recovering                  | 75                      |                                 |                                    |                             |                                        |                                    |                |                                                  |
| 19 <sup>a</sup> | After                       | 75                      |                                 |                                    |                             |                                        |                                    |                |                                                  |
| 23              | After                       | 100                     | 103.2                           | 45.4                               | 148.6 <sup>c</sup>          | 1.38                                   | 1.98                               |                |                                                  |
| 30              | After                       | 100                     | 189.4                           | 45.7                               | 235.1 <sup>c</sup>          | 1.89                                   | 2.35                               |                |                                                  |
| 33              | After                       | 100                     | 185.2                           | 62.6                               | 247.8 <sup>c</sup>          | 1.85                                   | 2.48                               |                |                                                  |

C/D, concentration-to-dose; TDM, therapeutic drug monitoring; WBC, white blood cell count. **The TDM that provided the peak results is in orange font. Fever and WBC abnormal values are in blue font.**

<sup>a</sup>Treatment with Chinese medication for influenza called Jin Lian Hua capsules.

<sup>b</sup>This value was not used in calculating the mean of C/D ratios after influenza.. The patient was recovering from influenza.

<sup>c</sup>These 3 values were used in calculating a mean of 2.27 for the total C/D ratios after influenza.

**SUPPLEMENTARY TABLE S6. Patient 4: Changes in clozapine steady-state TDM, clozapine dosages and WBC before and during a respiratory viral infection with no leukocytosis**

| Day                | Respiratory viral infection | Clozapine dose (mg/day) | Clozapine concentration (ng/ml) | Norclozapine concentration (ng/ml) | Total concentration (ng/ml) | Clozapine C/D ratio (ng/ml per mg/day) | Total C/D ratio (ng/ml per mg/day) | WBC count (x 10 <sup>9</sup> cell/L)<br>4.0-10.0 |
|--------------------|-----------------------------|-------------------------|---------------------------------|------------------------------------|-----------------------------|----------------------------------------|------------------------------------|--------------------------------------------------|
| 1 <sup>a</sup>     | Before                      | 200                     |                                 |                                    |                             |                                        |                                    |                                                  |
| 23 <sup>a</sup>    | Before                      | 200                     | 468.3                           | 147.2                              | 615.5                       | 2.34                                   | 3.08 <sup>d</sup>                  |                                                  |
| 31 <sup>a</sup>    | Before                      | 200                     | 463.9                           | 132.6                              | 596.5                       | 2.32                                   | 2.98 <sup>d</sup>                  |                                                  |
| 169 <sup>b</sup>   | Before                      | 100                     |                                 |                                    |                             |                                        |                                    |                                                  |
| 185 <sup>b,c</sup> | Infection                   | 250                     |                                 |                                    |                             |                                        |                                    | 6.4                                              |
| 187 <sup>b,c</sup> | Infection                   | 250                     |                                 |                                    |                             |                                        |                                    |                                                  |
| 190 <sup>b,c</sup> | Infection                   | 250                     | 800.0                           | 348.0                              | 1,148.0                     | 3.20                                   | 4.59 <sup>e</sup>                  | 9.7                                              |
| 197 <sup>b,c</sup> | Infection                   | 250                     | 837.9                           | 399.1                              | 1,237.0                     | 3.35                                   | 4.95 <sup>e</sup>                  |                                                  |
| 206 <sup>b,c</sup> | Infection                   | 250                     | 633.3                           | 342.2                              | 975.0                       | 2.53                                   | 3.90 <sup>e</sup>                  | 6.7                                              |
| 212 <sup>b,c</sup> | Infection                   | 250                     |                                 |                                    |                             |                                        |                                    |                                                  |

C/D, concentration-to-dose; TDM, therapeutic drug monitoring; WBC, white blood cell count. **The TDM that provided the peak results is in orange font.**

<sup>a</sup>First admission.

<sup>b</sup>Second admission.

<sup>c</sup>The patient was intermittently treated with a Chinese treatment for influenza called Jin Lian Hua capsules.

<sup>d</sup>These 2 values were used to calculate a mean of 3.03 for the total C/D ratios before the influenza.

<sup>e</sup>These 3 values were used to calculate a mean of 4.48 for the total C/D ratios during the influenza. The total C/D ratio of 4.95 was considered the peak value.

**SUPPLEMENTARY TABLE S7. Patient 5: Changes in clozapine steady-state TDM, clozapine dosages and WBC before, during and after respiratory viral infection with no leukocytosis**

| Day              | Respiratory viral infection | Clozapine dose (mg/day) | Clozapine concentration (ng/ml) | Norclozapine concentration (ng/ml) | Total concentration (ng/ml) | Clozapine C/D ratio (ng/ml per mg/day) | Total C/D ratio (ng/ml per mg/day) | WBC count (x 10 <sup>9</sup> cell/L)<br>4.0-10.0 |
|------------------|-----------------------------|-------------------------|---------------------------------|------------------------------------|-----------------------------|----------------------------------------|------------------------------------|--------------------------------------------------|
| 1 <sup>a</sup>   | Before                      | 200                     |                                 |                                    |                             |                                        |                                    |                                                  |
| 34 <sup>a</sup>  | Before                      | 200                     | 403.3                           | 201.9                              | 605.2                       | 2.02                                   | 3.03                               |                                                  |
| 59 <sup>a</sup>  | Before                      | 200                     | 358.1                           | 186.9                              | 544.0                       | 1.79                                   | 2.73                               |                                                  |
| 91 <sup>a</sup>  | Before                      | 200                     | 359.1                           | 156.5                              | 515.6                       | 1.80                                   | 2.58                               |                                                  |
| 129 <sup>a</sup> | Before                      | 200                     | 340.5                           | 140.8                              | 481.3                       | 1.70                                   | 2.41                               |                                                  |
| 167 <sup>a</sup> | Before                      | 200                     | 381.0                           | 130.2                              | 511.2                       | 1.91                                   | 2.56                               |                                                  |
| 195 <sup>a</sup> | Before                      | 200                     | 334.2                           | 132.8                              | 467.0                       | 1.67                                   | 2.34                               |                                                  |
| 209 <sup>a</sup> | Before                      | 200                     | 359.1                           | 144.3                              | 503.4                       | 1.80                                   | 2.52                               |                                                  |
| 226 <sup>a</sup> | Before                      | 200                     | 338.1                           | 152.0                              | 490.1                       | 1.69                                   | 2.45                               |                                                  |
| 244 <sup>a</sup> | Before                      | 200                     | 376.4                           | 169.7                              | 546.1                       | 1.88                                   | 2.73                               |                                                  |
| 264 <sup>a</sup> | Before                      | 200                     | 261.4                           | 113.5                              | 374.9                       | 1.31                                   | 1.87                               |                                                  |
| 276 <sup>a</sup> | Before                      | 200                     | 315.0                           | 160.4                              | 475.4                       | 1.58                                   | 2.38                               |                                                  |
| 286 <sup>a</sup> | Before                      | 200                     | 297.0                           | 143.1                              | 440.1                       | 1.49                                   | 2.20                               |                                                  |
| 299 <sup>a</sup> | Before                      | 200                     | 306.7                           | 147.5                              | 454.2                       | 1.53                                   | 2.27                               |                                                  |
| 315 <sup>a</sup> | Before                      | 200                     | 355.2                           | 174.9                              | 530.1                       | 1.78                                   | 2.65                               |                                                  |
| 341 <sup>b</sup> | Before                      | 200                     |                                 |                                    |                             |                                        |                                    |                                                  |
| 349 <sup>b</sup> | Before                      | 200                     | 292.9                           | 134.0                              | 426.9                       | 1.46                                   | 2.13                               | 5.6                                              |
| 362 <sup>b</sup> | Before                      | 200                     | 316.5                           | 150.1                              | 466.6                       | 1.58                                   | 2.33                               |                                                  |
| 363 <sup>b</sup> | Infection                   | 200                     |                                 |                                    |                             |                                        |                                    |                                                  |
| 377 <sup>b</sup> | Infection                   | 200                     | 402.4                           | 190.4                              | 592.8                       | 2.01                                   | 2.96                               |                                                  |
| 381 <sup>b</sup> | Infection                   | 200                     | 258.9                           | 135.5                              | 394.4                       | 1.29                                   | 1.97                               |                                                  |
| 412 <sup>b</sup> | Infection                   | 200                     | 350.2                           | 145.1                              | 495.3                       | 1.75                                   | 2.48                               | 5.5                                              |
| 418 <sup>b</sup> | Last day                    | 200                     |                                 |                                    |                             |                                        |                                    |                                                  |
| 431 <sup>b</sup> | After                       | 200                     | 370.8                           | 156.8                              | 527.6                       | 1.85                                   | 2.64                               |                                                  |
| 458 <sup>b</sup> | After                       | 200                     | 408.5                           | 175.3                              | 583.8                       | 2.04                                   | 2.92                               | 5.4                                              |
| 492 <sup>b</sup> | After                       | 200                     | 306.5                           | 136.8                              | 443.3                       | 1.53                                   | 2.22                               |                                                  |
| 499 <sup>b</sup> | After                       | 200                     | 260.8                           | 125.8                              | 386.6                       | 1.30                                   | 1.93                               |                                                  |
| 513 <sup>b</sup> | After                       | 200                     | 397.8                           | 160.4                              | 558.2                       | 1.99                                   | 2.79                               |                                                  |
| 519 <sup>b</sup> | After                       | 200                     | 347.5                           | 173.7                              | 521.2                       | 1.74                                   | 2.61                               |                                                  |
| 519 <sup>b</sup> | After                       | 200                     | 347.5                           | 173.7                              | 521.2                       | 1.74                                   | 2.61                               |                                                  |
| 527 <sup>b</sup> | After                       | 200                     | 307.6                           | 143.7                              | 451.3                       | 1.54                                   | 2.26                               |                                                  |
| 534 <sup>b</sup> | After                       | 200                     | 351.0                           | 165.3                              | 516.3                       | 1.76                                   | 2.58                               |                                                  |

|                  |       |     |       |       |       |      |      |
|------------------|-------|-----|-------|-------|-------|------|------|
| 542 <sup>b</sup> | After | 200 | 407.5 | 163.6 | 571.1 | 2.04 | 2.86 |
| 552 <sup>b</sup> | After | 200 | 397.5 | 152.6 | 550.1 | 1.99 | 2.75 |
| 559 <sup>b</sup> | After | 200 | 297.5 | 136.2 | 433.7 | 1.49 | 2.17 |
| 566 <sup>b</sup> | After | 200 | 354.9 | 152.1 | 507.0 | 1.77 | 2.54 |
| 573 <sup>b</sup> | After | 200 | 372.5 | 131.8 | 504.3 | 1.86 | 2.52 |
| 580 <sup>b</sup> | After | 200 | 411.4 | 173.4 | 584.8 | 2.06 | 2.92 |
| 587 <sup>b</sup> | After | 200 | 262.2 | 118.0 | 380.2 | 1.31 | 1.90 |
| 594 <sup>b</sup> | After | 200 | 326.4 | 129.6 | 456.0 | 1.63 | 2.28 |
| 600 <sup>b</sup> | After | 200 | 392.5 | 142.1 | 534.6 | 1.96 | 2.67 |
| 608 <sup>b</sup> | After | 200 | 419.6 | 168.4 | 588.0 | 2.10 | 2.94 |
| 624 <sup>b</sup> | After | 200 | 329.6 | 142.4 | 472.0 | 1.65 | 2.36 |
| 630 <sup>b</sup> | After | 200 | 401.9 | 145.4 | 547.3 | 2.01 | 2.74 |
| 646 <sup>b</sup> | After | 200 | 388.5 | 152.1 | 540.6 | 1.94 | 2.70 |
| 671 <sup>b</sup> | After | 200 | 241.8 | 126.4 | 368.2 | 1.21 | 1.84 |
| 679 <sup>b</sup> | After | 200 | 345.6 | 145.3 | 490.9 | 1.73 | 2.45 |

C/D, concentration-to-dose; TDM, therapeutic drug monitoring; WBC, white blood cell count. **The TDM that provided the peak results is in orange font.**

<sup>a</sup>First admission.

<sup>b</sup>Second admission.

**SUPPLEMENTARY TABLE S8. Patient 6: Changes in clozapine steady-state TDM, clozapine dosages and WBC before, during and after respiratory viral infection with leukocytosis**

| Day               | Respiratory viral infection | Clozapine dose (mg/day) | Clozapine concentration (ng/ml) | Norclozapine concentration (ng/ml) | Total concentration (ng/ml) | Clozapine C/D ratio (ng/ml per mg/day) | Total C/D ratio (ng/ml per mg/day) | WBC count (x 10 <sup>9</sup> cell/L)<br>4.0-10.0 |
|-------------------|-----------------------------|-------------------------|---------------------------------|------------------------------------|-----------------------------|----------------------------------------|------------------------------------|--------------------------------------------------|
| 1 <sup>a</sup>    | Before                      | 400                     |                                 |                                    |                             |                                        |                                    |                                                  |
| 2 <sup>a</sup>    | Before                      | 375                     |                                 |                                    |                             |                                        |                                    |                                                  |
| 6 <sup>a</sup>    | Before                      | 350                     |                                 |                                    |                             |                                        |                                    |                                                  |
| 7 <sup>a</sup>    | Before                      | 325                     |                                 |                                    |                             |                                        |                                    |                                                  |
| 8 <sup>a</sup>    | Before                      | 300                     |                                 |                                    |                             |                                        |                                    |                                                  |
| 20 <sup>a</sup>   | Before                      | 275                     |                                 |                                    |                             |                                        |                                    |                                                  |
| 35 <sup>b</sup>   | Before                      | 275                     |                                 |                                    |                             |                                        |                                    |                                                  |
| 43 <sup>b</sup>   | Before                      | 275                     |                                 |                                    |                             |                                        |                                    | 7.2                                              |
| 44 <sup>b</sup>   | Before                      | 275(200) <sup>d</sup>   | 233.3                           | 120.9                              | 354.2                       | 0.85                                   | 1.29                               |                                                  |
| 46 <sup>b,c</sup> | Infection                   | 200                     |                                 |                                    |                             |                                        |                                    |                                                  |
| 50 <sup>b,c</sup> | Infection                   | 200                     | 772.0                           | 247.0                              | 1019.0                      | 3.86                                   | 5.10                               |                                                  |
| 55 <sup>b,c</sup> | Infection                   | 200                     |                                 |                                    |                             |                                        |                                    |                                                  |
| 59 <sup>b</sup>   | Infection                   | 200                     | 348.8                           | 130.7                              | 479.5                       | 1.74                                   | 2.40                               |                                                  |
| 63 <sup>b</sup>   | Infection                   | 200                     | 589.8                           | 195.6                              | 785.4                       | 2.95                                   | 3.93                               |                                                  |
| 70 <sup>b</sup>   | Infection                   | 200                     |                                 |                                    |                             |                                        |                                    | 8.1                                              |
| 71 <sup>b</sup>   | Infection                   | 200                     | 562.3                           | 209.2                              | 771.5                       | 2.81                                   | 3.86                               |                                                  |
| 75 <sup>b</sup>   | Infection                   | 175                     |                                 |                                    |                             |                                        |                                    |                                                  |
| 78 <sup>b</sup>   | Last day                    | 150                     |                                 |                                    |                             |                                        |                                    | 15.0                                             |
| 84 <sup>b</sup>   | After                       | 150                     | 265.9                           | 126.7                              | 392.6                       | 1.77                                   | 2.62                               |                                                  |
| 94 <sup>b</sup>   | After                       | 150                     | 211.8                           | 96.5                               | 308.3                       | 1.41                                   | 2.06                               | 11.5                                             |
| 280 <sup>b</sup>  | After                       | 150                     | 144.5                           | 60.4                               | 204.9                       | 0.96                                   | 1.37                               |                                                  |
| 282 <sup>b</sup>  | After                       | 200                     |                                 |                                    |                             |                                        |                                    |                                                  |
| 287 <sup>b</sup>  | After                       | 200                     | 231.6                           | 81.8                               | 313.4                       | 1.16                                   | 1.57                               |                                                  |
| 288 <sup>b</sup>  | After                       | 250                     |                                 |                                    |                             |                                        |                                    |                                                  |
| 294 <sup>b</sup>  | After                       | 250                     | 285.5                           | 113.2                              | 398.7                       | 1.14                                   | 1.59                               |                                                  |
| 308 <sup>b</sup>  | After                       | 250                     | 466.9                           | 181.9                              | 648.8                       | 1.87                                   | 2.60                               |                                                  |
| 310 <sup>b</sup>  | After                       | 275                     |                                 |                                    |                             |                                        |                                    |                                                  |
| 315 <sup>b</sup>  | After                       | 275                     | 324.8                           | 147.2                              | 472.0                       | 1.18                                   | 1.72                               |                                                  |
| 316 <sup>b</sup>  | After                       | 250                     |                                 |                                    |                             |                                        |                                    |                                                  |
| 322 <sup>b</sup>  | After                       | 250                     | 367.3                           | 147.6                              | 514.9                       | 1.47                                   | 2.06                               |                                                  |
| 329 <sup>b</sup>  | After                       | 250                     | 291.4                           | 134.0                              | 425.4                       | 1.17                                   | 1.70                               |                                                  |
| 336 <sup>b</sup>  | After                       | 250                     | 275.7                           | 121.7                              | 397.4                       | 1.10                                   | 1.59                               |                                                  |

|                  |       |     |       |       |       |      |      |
|------------------|-------|-----|-------|-------|-------|------|------|
| 343 <sup>b</sup> | After | 200 |       |       |       |      |      |
| 346 <sup>b</sup> | After | 200 | 283.0 | 142.3 | 425.3 | 1.42 | 2.13 |
| 351 <sup>b</sup> | After | 200 | 468.2 | 149.5 | 617.7 | 2.34 | 3.09 |

C/D, concentration-to-dose; TDM, therapeutic drug monitoring; WBC, white blood cell count. **The TDM that provided the peak results is in orange font. In blue, WBC abnormal values are in blue font.**

<sup>a</sup>First admission.

<sup>b</sup>Second admission.

<sup>c</sup>The patient was treated with Chinese treatments for influenza called Jing Hua Qing Gan Ke Li and Qing Re Jie Du Ke Li.

<sup>d</sup>The clozapine dose was changed after collecting blood. The clozapine dose of 200 mg/day was used to calculate the C/D ratios.

**SUPPLEMENTARY TABLE S9. Patient 7: Changes in clozapine steady-state TDM, clozapine dosages and WBC during and after 2 possible undiagnosed infections with leukocytosis**

| Day | Possible infection     | Clozapine dose (mg/day) | Clozapine concentration (ng/ml) | Norclozapine concentration (ng/ml) | Total concentration (ng/ml) | Clozapine C/D ratio (ng/ml per mg/day) | Total C/D ratio (ng/ml per mg/day) | WBC count (x 10 <sup>9</sup> cell/L)<br>4.0-10.0 |
|-----|------------------------|-------------------------|---------------------------------|------------------------------------|-----------------------------|----------------------------------------|------------------------------------|--------------------------------------------------|
| 1   | Before                 | 100                     |                                 |                                    |                             |                                        |                                    |                                                  |
| 16  | Before                 | 100                     | 168.0                           | 71.9                               | 239.9                       | 1.68                                   | 2.40                               |                                                  |
| 28  | Before                 | 100                     | 179.1                           | 85.2                               | 264.3                       | 1.79                                   | 2.64                               |                                                  |
| 46  | Before                 | 100                     | 125.8                           | 50.9                               | 176.7                       | 1.26                                   | 1.77                               |                                                  |
| 60  | Before                 | 100                     | 119.0                           | 67.5                               | 186.5                       | 1.19                                   | 1.87                               |                                                  |
| 78  | Before                 | 100                     | 144.0                           | 82.2                               | 226.2                       | 1.44                                   | 2.26                               |                                                  |
| 92  | Before                 | 100                     | 160.5                           | 85.6                               | 246.1                       | 1.61                                   | 2.46                               |                                                  |
| 107 | Before                 | 100                     | 164.2                           | 63.7                               | 227.9                       | 1.64                                   | 2.28                               |                                                  |
| 119 | Before                 | 100                     | 121.9                           | 58.5                               | 180.4                       | 1.22                                   | 1.80                               |                                                  |
| 133 | Before                 | 100                     | 110.8                           | 53.1                               | 163.9                       | 1.11                                   | 1.64                               |                                                  |
| 147 | Before                 | 100                     | 129.9                           | 58.1                               | 188.0                       | 1.30                                   | 1.88                               |                                                  |
| 161 | Before                 | 100                     | 130.3                           | 58.7                               | 189.0                       | 1.30                                   | 1.89                               |                                                  |
| 175 | Before                 | 100                     | 133.2                           | 58.7                               | 191.9                       | 1.33                                   | 1.92                               |                                                  |
| 189 | Before                 | 100                     | 109.2                           | 50.8                               | 160.0                       | 1.09                                   | 1.60                               |                                                  |
| 204 | Infection <sup>a</sup> | 100                     | 365.4                           | 169.1                              | 534.5                       | 3.65                                   | 5.35                               |                                                  |
| 207 | Infection <sup>a</sup> | 100                     |                                 |                                    |                             |                                        |                                    | 9.2                                              |
| 217 | Infection <sup>a</sup> | 100                     | 202.7                           | 86.6                               | 289.3                       | 2.03                                   | 2.89                               |                                                  |
| 231 | Infection <sup>a</sup> | 100                     | 221.8                           | 86.3                               | 308.1                       | 2.22                                   | 3.08                               | 12.2                                             |
| 244 | After                  | 100                     | 172.3                           | 73.8                               | 246.1                       | 1.72                                   | 2.46                               | 8.8                                              |
| 273 | After                  | 100                     |                                 |                                    |                             |                                        |                                    | 7.5                                              |
| 287 | Infection <sup>b</sup> | 100                     | 196.7                           | 87.3                               | 284.0                       | 1.97                                   | 2.84                               | 11.1                                             |
| 289 | Infection <sup>b</sup> | 100                     |                                 |                                    |                             |                                        |                                    |                                                  |
| 301 | Infection <sup>b</sup> | 100                     | 167.3                           | 74.1                               | 241.4                       | 1.67                                   | 2.41                               | 9.2                                              |
| 315 | Infection <sup>b</sup> | 100                     | 175.9                           | 98.1                               | 274.0                       | 1.76                                   | 2.74                               | 6.3                                              |
| 330 | Infection <sup>b</sup> | 100                     | 216.8                           | 99.3                               | 316.1                       | 2.17                                   | 3.16                               | 14.6                                             |
| 344 | After                  | 100                     | 185.9                           | 85.5                               | 271.4                       | 1.86                                   | 2.71                               | 7.4                                              |

C/D, concentration-to-dose; TDM, therapeutic drug monitoring; WBC, white blood cell count. **The TDM that provided the peak results is in orange font. In blue, WBC abnormal values are in blue font.**

<sup>a</sup>The patient complained of headache and sore body. The treating physician thought there were no symptoms to treat. This possible episode of infection may have lasted up to 28 days.

<sup>b</sup>The patient complained of cold-like symptoms. The treating physician thought there were no symptoms to treat. This possible episode of infection may have lasted up to 44 days.



**SUPPLEMENTARY TABLE S10. Patient 8: Changes in clozapine steady-state TDM, clozapine dosages, temperature and WBC before, during and after pneumonia**

| Day             | Pneumonia | Clozapine dose<br>(mg/day) | Clozapine concentration<br>(ng/ml) | Norclozapine concentration<br>(ng/ml) | Total concentration<br>(ng/ml) | Clozapine C/D ratio<br>(ng/ml per mg/day) | Total C/D ratio<br>(ng/ml per mg/day) | Temperature<br>°C | WBC count<br>(x 10 <sup>9</sup> cell/L)<br>4.0-10.0 |
|-----------------|-----------|----------------------------|------------------------------------|---------------------------------------|--------------------------------|-------------------------------------------|---------------------------------------|-------------------|-----------------------------------------------------|
| 1               | Before    | 125                        |                                    |                                       |                                |                                           |                                       |                   | 10.0                                                |
| 6               | Infection | 125                        | 483.1                              | 172.6                                 | 655.7                          | 3.86                                      | 5.25                                  |                   | 12.8                                                |
| 7 <sup>a</sup>  | Infection |                            |                                    |                                       |                                |                                           |                                       |                   |                                                     |
| 8 <sup>b</sup>  | Infection |                            |                                    |                                       |                                |                                           |                                       | 39.2              | 9.0                                                 |
| 9 <sup>c</sup>  | Infection |                            |                                    |                                       |                                |                                           |                                       |                   | 7.9                                                 |
| 12 <sup>c</sup> | Infection |                            |                                    |                                       |                                |                                           |                                       |                   | 9.8                                                 |
| 14 <sup>c</sup> | Last day  | 125                        | 339.7                              | 148.4                                 | 488.1                          | 2.72                                      | 3.90                                  |                   |                                                     |
| 15 <sup>d</sup> | After     |                            |                                    |                                       |                                |                                           |                                       |                   |                                                     |
| 21              | After     | 125                        | 355.4                              | 86.7                                  | 442.1                          | 2.84                                      | 3.54                                  |                   | 8.9                                                 |
| 25              | After     | 150                        |                                    |                                       |                                |                                           |                                       |                   |                                                     |
| 27              | After     |                            |                                    |                                       |                                |                                           |                                       |                   | 11.9                                                |
| 32              | After     | 125                        |                                    |                                       |                                |                                           |                                       |                   |                                                     |
| 34              | After     |                            |                                    |                                       |                                |                                           |                                       |                   | 9.0                                                 |
| 41              | After     | 125                        | 262.1                              | 91.2                                  | 353.3                          | 2.10                                      | 2.83                                  |                   | 10.8                                                |

C/D, concentration-to-dose; TDM, therapeutic drug monitoring; WBC, white blood cell count. **The TDM that provided the peak results is in orange font. Fever and WBC abnormal values are in blue font.**

<sup>a</sup>Initially the patient was treated with oral Chinese medications for influenza: Jing Hua Qing Gan capsule and Qiang Re Jie Du liquid.

<sup>b</sup>After the diagnosis of pneumonia, Jing Hua Qing Gan capsule and Qiang Re Jie Du liquid was continued and intravenous levofloxacin was added. Levofloxacin is not a CYP1A2 inhibitor [S2] and it was prescribed for only 1 day.

<sup>c</sup>Jing Hua Qing Gan capsule, Qiang Re Jie Du liquid, intravenous cefotiam and intravenous azithromycin.

<sup>d</sup>The medication for influenza and the antibiotics were discontinued.

**SUPPLEMENTARY TABLE S11. Patient 9: Changes in clozapine steady-state TDM, clozapine dosages and WBC before, during and after viral infection with leukocytosis (possible influenza)**

| Day | Respiratory viral infection | Clozapine dose (mg/day) | Clozapine concentration (ng/ml) | Norclozapine concentration (ng/ml) | Total concentration (ng/ml) | Clozapine C/D ratio (ng/ml per mg/day) | Total C/D ratio (ng/ml per mg/day) | WBC count (x 10 <sup>9</sup> cell/L)<br>4.0-10.0 |
|-----|-----------------------------|-------------------------|---------------------------------|------------------------------------|-----------------------------|----------------------------------------|------------------------------------|--------------------------------------------------|
| 1   |                             | unknown                 |                                 |                                    |                             |                                        |                                    |                                                  |
| 3   | Before                      | 150                     |                                 |                                    |                             |                                        |                                    |                                                  |
| 6   | Before                      | 200                     |                                 |                                    |                             |                                        |                                    |                                                  |
| 8   | Before                      | 200 <b>170</b>          | <b>295.1<sup>a</sup></b>        | <b>70.8<sup>a</sup></b>            | <b>365.9<sup>a</sup></b>    | <b>1.74</b>                            | <b>2.15</b>                        |                                                  |
| 15  | Infection <sup>b</sup>      | 200 (250)               | 330.7                           | 84.7                               | 415.4                       | 1.65                                   | 2.08                               | <b>14.1</b>                                      |
| 17  | Infection <sup>b</sup>      | 250                     |                                 |                                    |                             |                                        |                                    | <b>14.5</b>                                      |
| 21  | Infection <sup>b</sup>      | 275                     |                                 |                                    |                             |                                        |                                    |                                                  |
| 24  | Infection <sup>b</sup>      | 300                     |                                 |                                    |                             |                                        |                                    |                                                  |
| 29  | Infection <sup>b</sup>      | 300                     | 370.3                           | 93.2                               | 463.5                       | 1.23                                   | 1.55                               | <b>10.4</b>                                      |
| 30  | Infection <sup>b</sup>      | 300                     |                                 |                                    |                             |                                        |                                    |                                                  |
| 33  | Infection <sup>b</sup>      | 300                     | 216.2                           | 72.9                               | 289.1                       | 0.72                                   | 0.96                               | 8.8                                              |
| 36  | Infection <sup>b</sup>      | 300                     | <b>1132.5</b>                   | <b>339.8</b>                       | <b>1472.3</b>               | <b>3.78</b>                            | <b>4.91</b>                        |                                                  |
| 37  | Discharged <sup>b</sup>     | 300                     |                                 |                                    |                             |                                        |                                    |                                                  |
| 38  | Outpatient <sup>c</sup>     | 300 (400) <sup>d</sup>  | 741.6                           | 199.1                              | 940.7                       | 1.85                                   | 2.35                               |                                                  |
| 43  | Outpatient <sup>c</sup>     | 400                     | 655.8                           | 169.5                              | 825.3                       | 1.64                                   | 2.06                               |                                                  |
| 50  | Outpatient <sup>c</sup>     | 400                     | 906.5                           | 248.7                              | 1155.2                      | 2.27                                   | 2.87                               |                                                  |
| 52  | Outpatient <sup>c</sup>     | 375                     |                                 |                                    |                             |                                        |                                    |                                                  |
| 64  | Outpatient <sup>c</sup>     | 375                     | 639.7                           | 173.7                              | 813.4                       | 1.71                                   | 2.17                               |                                                  |

C/D, concentration-to-dose; TDM, therapeutic drug monitoring; WBC, white blood cell count. **Red font is used to explain that the concentrations were not in steady state. The TDM that provided the peak results is in orange font. WBC abnormal values are in blue font.**

<sup>a</sup>This concentration is not steady state. It reflects 3 days on 150 mg/day and 2 days on 200 mg/day. The average dose during these 5 days is 170 mg/day. We had no baseline steady-state concentration before influenza, so we estimated the C/D ratios using this concentration that is not in steady state.

<sup>b</sup>The medical record with data on co-medication could not be found. We do not know whether or not the patient was treated with Chinese medication for influenza.

<sup>c</sup>After discharge the outpatient doctor sent the clozapine TDM to our lab, but we had no access to the outpatient record. We do not know whether or not the patient had recovered from the influenza. Only inpatient data was used to establish the elevation of the total clozapine C/D ratio.

**SUPPLEMENTARY TABLE S12. Patient 10: Changes in clozapine steady-state TDM, clozapine dosages, temperature and WBC before, during and after pneumonia**

| Day                 | Pneumonia | Clozapine dose<br>(mg/day) | Clozapine concentration<br>(ng/ml) | Norclozapine concentration<br>(ng/ml) | Total concentration<br>(ng/ml) | Clozapine C/D ratio<br>(ng/ml per mg/day) | Total C/D ratio<br>(ng/ml per mg/day) | Temperature °C | WBC count<br>(x 10 <sup>9</sup> cell/L)<br>4.0-10.0 | Sertraline /perphenazine<br>(mg/day) |
|---------------------|-----------|----------------------------|------------------------------------|---------------------------------------|--------------------------------|-------------------------------------------|---------------------------------------|----------------|-----------------------------------------------------|--------------------------------------|
| 1 <sup>a</sup>      | Before    | 50                         |                                    |                                       |                                |                                           |                                       |                |                                                     | 0/0                                  |
| 4 <sup>a</sup>      | Before    | 125                        |                                    |                                       |                                |                                           |                                       |                |                                                     | 0/0                                  |
| 5 <sup>a</sup>      | Before    | 200                        |                                    |                                       |                                |                                           |                                       |                |                                                     | 0/0                                  |
| 7 <sup>a</sup>      | Infection | 200 (155)                  | 561.9                              | 235.9                                 | 797.8                          | 3.63                                      | 5.15                                  |                |                                                     | 0/0                                  |
| 8 <sup>a</sup>      | Infection | 225                        |                                    |                                       |                                |                                           |                                       |                |                                                     | 0/0                                  |
| 11 <sup>a</sup>     | Infection | 225                        |                                    |                                       |                                |                                           |                                       |                | 8.1                                                 | 0/0                                  |
| 12 <sup>a,b</sup>   | Infection | 225                        |                                    |                                       |                                |                                           |                                       | 39.2           | 10.1                                                | 0/0                                  |
| 13 <sup>a,b</sup>   | Infection | 225                        |                                    |                                       |                                |                                           |                                       | 39.2           |                                                     | 0/0                                  |
| 15 <sup>a,b</sup>   | Infection | 225                        | 523.0                              | 254.3                                 | 777.3                          | 2.32                                      | 3.45                                  |                |                                                     | 0/0                                  |
| 16 <sup>a,b</sup>   | Infection | 200                        |                                    |                                       |                                |                                           |                                       |                |                                                     | 0/0                                  |
| 21 <sup>a,b</sup>   | Infection | 200                        |                                    |                                       |                                |                                           |                                       |                |                                                     | 0/0                                  |
| 22 <sup>a</sup>     | Improved  | 200                        | 319.5                              | 165.4                                 | 484.9                          | 1.60                                      | 2.42                                  |                | 5.8                                                 | 0/0                                  |
| 24 <sup>a,c</sup>   | Infection | 200                        |                                    |                                       |                                |                                           |                                       | 38.6           | 15.9                                                | 0/0                                  |
| 25 <sup>a,d</sup>   | Infection | 200                        |                                    |                                       |                                |                                           |                                       | 38.5           |                                                     | 0/0                                  |
| 26 <sup>a,d</sup>   | Infection | 200                        |                                    |                                       |                                |                                           |                                       |                | 13.9                                                | 0/0                                  |
| 28 <sup>a,e,f</sup> | Infection | 200                        |                                    |                                       |                                |                                           |                                       |                |                                                     | 0/0                                  |
| 29 <sup>a,g</sup>   | Infection | 200                        |                                    |                                       |                                |                                           |                                       |                |                                                     | 0/0                                  |
| 30 <sup>a,g</sup>   | Infection | 200                        |                                    |                                       |                                |                                           |                                       |                |                                                     | 0/0                                  |
| 31 <sup>a,f,g</sup> | Infection | 200                        |                                    |                                       |                                |                                           |                                       |                |                                                     | 0/0                                  |
| 35 <sup>a,f,g</sup> | Infection | 200                        |                                    |                                       |                                |                                           |                                       |                |                                                     | 0/0                                  |
| 41 <sup>a,g</sup>   | Infection | 200                        | 289.3                              | 170.1                                 | 459.4                          | 1.45                                      | 2.30                                  |                | 10.3                                                | 0/0                                  |
| 43 <sup>a,h</sup>   | Infection | 250                        |                                    |                                       |                                |                                           |                                       |                |                                                     | 0/0                                  |
| 44 <sup>a,i</sup>   | Infection | 250                        |                                    |                                       |                                |                                           |                                       |                |                                                     | 0/0                                  |
| 46 <sup>a,i</sup>   | Infection | 275                        |                                    |                                       |                                |                                           |                                       |                |                                                     | 0/0                                  |
| 47 <sup>a,i</sup>   | Infection | 275                        |                                    |                                       |                                |                                           |                                       |                | 13.6                                                | 0/0                                  |
| 48 <sup>a,f,i</sup> | Infection | 275                        |                                    |                                       |                                |                                           |                                       |                |                                                     | 0/0                                  |
| 49 <sup>a,f,i</sup> | Infection | 200                        |                                    |                                       |                                |                                           |                                       |                |                                                     | 0/0                                  |
| 50 <sup>a,f,i</sup> | Infection | 200 (260)                  | 811.1                              | 298.5                                 | 1,109.6                        | 3.12                                      | 4.27                                  |                |                                                     | 0/0                                  |
| 51 <sup>a,i,j</sup> | Infection | 200                        |                                    |                                       |                                |                                           |                                       |                |                                                     | 0/0                                  |
| 153 <sup>k</sup>    | After     | 150                        |                                    |                                       |                                |                                           |                                       |                |                                                     | 0/0                                  |
| 160 <sup>k</sup>    | After     | 175                        |                                    |                                       |                                |                                           |                                       |                |                                                     | 0/0                                  |
| 162 <sup>k</sup>    | After     | 200                        |                                    |                                       |                                |                                           |                                       |                |                                                     | 0/0                                  |

|                  |       |           |       |       |         |      |      |          |
|------------------|-------|-----------|-------|-------|---------|------|------|----------|
| 164 <sup>k</sup> | After | 200 (185) | 323.3 | 137.4 | 460.7   | 1.75 | 2.49 | 0/0      |
| 165 <sup>k</sup> | After | 225       |       |       |         |      |      | 0/0      |
| 170 <sup>k</sup> | After | 250       |       |       |         |      |      | 0/0      |
| 171 <sup>k</sup> | After | 250 (230) | 339.4 | 168.4 | 507.8   | 1.48 | 2.21 | 0/0      |
| 172 <sup>k</sup> | After | 275       |       |       |         |      |      | 0/0      |
| 175 <sup>k</sup> | After | 250       |       |       |         |      |      | 50/0     |
| 176 <sup>k</sup> | After | 300       |       |       |         |      |      | 50/0     |
| 178 <sup>k</sup> | After | 300       |       |       |         |      |      | 9.6 50/0 |
| 183 <sup>k</sup> | After | 350       |       |       |         |      |      | 50/0     |
| 184 <sup>k</sup> | After | 300       |       |       |         |      |      | 50/0     |
| 185 <sup>k</sup> | After | 350       |       |       |         |      |      | 100/0    |
| 189 <sup>k</sup> | After | 350       |       |       |         |      |      | 150/0    |
| 191 <sup>k</sup> | After | 350       | 691.6 | 318.7 | 1,010.3 | 1.98 | 2.89 | 150/0    |
| 205 <sup>k</sup> | After | 350       | 616.7 | 309.9 | 926.6   | 1.76 | 2.65 | 150/0    |
| 209 <sup>k</sup> | After | 350       | 524.8 | 309.4 | 834.2   | 1.50 | 2.38 | 150/0    |
| 223 <sup>k</sup> | After | 350       | 529.4 | 214.9 | 744.3   | 1.51 | 2.13 | 150/4    |
| 225 <sup>k</sup> | After | 350       |       |       |         |      |      | 150/8    |
| 230 <sup>k</sup> | After | 350       | 534.7 | 238.2 | 772.9   | 1.53 | 2.21 | 150/8    |
| 235 <sup>k</sup> | After | 350       |       |       |         |      |      | 150/12   |
| 241 <sup>k</sup> | After | 350       | 573.8 | 313.9 | 887.7   | 1.64 | 2.54 | 150/12   |
| 248 <sup>k</sup> | After | 350       | 824.5 | 431.4 | 1,255.9 | 2.36 | 3.59 | 150/12   |
| 255 <sup>k</sup> | After | 350       | 614.9 | 355.9 | 970.8   | 1.76 | 2.77 | 150/0    |

C/D, concentration-to-dose; TDM, therapeutic drug monitoring; WBC, white blood cell count. Red font is used to explain that the concentrations were not in steady state. The TDM that provided the peak results is in orange font. Fever and WBC abnormal values are in blue font.

<sup>a</sup>The first admission lasted 51 days.

<sup>b</sup>Intravenous ceftriaxone sodium and Chinese medicine called Jing Hua Qing Gan Capsule.

<sup>c</sup>Intravenous levofloxacin. Levofloxacin is not a CYP1A2 inhibitor [S2]

<sup>d</sup>Intravenous levofloxacin and intravenous cefoperazone.

<sup>e</sup>Intravenous levofloxacin, intravenous cefoperazone and intravenous azithromycin.

<sup>f</sup>The patient was sent to a medical hospital for several hours.

<sup>g</sup>Intravenous cefoperazone and intravenous azithromycin.

<sup>h</sup>Moving from intravenous cefoperazone and intravenous azithromycin oral formulation of both antibiotics.

<sup>i</sup>Oral cefuroxime axetil and oral azithromycin.

<sup>j</sup>The patient was sent to a medical hospital for more than 3 months.

<sup>k</sup>The second admission lasted 103 days after the patient recovered from pneumonia and returned from the medical hospital.

**SUPPLEMENTARY TABLE S13. Patient 11: Not described because he had no steady-state therapeutic drug monitoring during the viral infection.**

**SUPPLEMENTARY TABLE S14. Patient 12: Changes in clozapine steady-state TDM, clozapine dosages and WBC before and during gastrointestinal infection/inflammation with leukocytosis**

| Day             | Gastro-intestinal infection | Clozapine dose (mg/day) | Clozapine concentration (ng/ml) | Norclozapine concentration (ng/ml) | Total concentration (ng/ml) | Clozapine C/D ratio (ng/ml per mg/day) | Total C/D ratio (ng/ml per mg/day) | WBC count (x 10 <sup>9</sup> cell/L)<br>4.0-10.0 |
|-----------------|-----------------------------|-------------------------|---------------------------------|------------------------------------|-----------------------------|----------------------------------------|------------------------------------|--------------------------------------------------|
| 1               | Before                      | 250                     |                                 |                                    |                             |                                        |                                    |                                                  |
| 3               | Before                      | 200                     |                                 |                                    |                             |                                        |                                    |                                                  |
| 6               | Before                      | 150                     |                                 |                                    |                             |                                        |                                    |                                                  |
| 7               | Before                      | 150                     |                                 |                                    |                             |                                        |                                    |                                                  |
| 9               | Before                      | 150                     |                                 |                                    |                             |                                        |                                    |                                                  |
| 16              | Before                      | 150                     | 433.4                           | 187.8                              | 621.2                       | 2.89                                   | 4.14                               | 9.2                                              |
| 23              | Infection                   | 150                     | 428.6                           | 205.9                              | 634.5                       | 2.86                                   | 4.23                               | 13.6                                             |
| 30              | Infection                   | 150                     | 492.2                           | 173.6                              | 665.8                       | 3.28                                   | 4.44                               | 11.9                                             |
| 31 <sup>a</sup> | Infection                   | 150                     |                                 |                                    |                             |                                        |                                    |                                                  |
| 34 <sup>a</sup> | Infection                   | 150                     |                                 |                                    |                             |                                        |                                    |                                                  |
| 35              | Infection                   | 150                     |                                 |                                    |                             |                                        |                                    |                                                  |
| 37              | Infection                   | 150                     | 657.7                           | 190.8                              | 848.5                       | 4.38                                   | 5.66                               | 14.1                                             |
| 44              | Infection                   | 150                     | 702.6                           | 264.0                              | 966.6                       | 4.68                                   | 6.44                               | 11.6                                             |
| 50              | Infection                   | 200                     |                                 |                                    |                             |                                        |                                    |                                                  |
| 54              | Infection                   | 200                     |                                 |                                    |                             |                                        |                                    | 11.3                                             |
| 62              | Infection                   | 200                     | 760.4                           | 245.9                              | 1006.3                      | 3.80                                   | 5.03                               | 9.7                                              |

C/D, concentration-to-dose; TDM, therapeutic drug monitoring; WBC, white blood cell count. **The TDM that provided the peak results is in orange font. WBC abnormal values are in blue font.**

<sup>a</sup>Diarrhea was treated with a medicinal clay (Smectite Dispersible Tablets).

**SUPPLEMENTARY TABLE S15. Patient 13: Changes in clozapine steady-state TDM, clozapine dosages and WBC during and after viral respiratory infection with fever and leukocytosis (possible influenza)**

| Day            | Respiratory viral infection | Clozapine dose (mg/day) | Clozapine concentration (ng/ml) | Norclozapine concentration (ng/ml) | Total concentration (ng/ml) | Clozapine C/D ratio (ng/ml per mg/day) | Total C/D ratio (ng/ml per mg/day) | Temperature °C | WBC count (x 10 <sup>9</sup> cell/L)<br>4.0-10.0 |
|----------------|-----------------------------|-------------------------|---------------------------------|------------------------------------|-----------------------------|----------------------------------------|------------------------------------|----------------|--------------------------------------------------|
| 1              | Infection                   | 50                      |                                 |                                    |                             |                                        |                                    |                |                                                  |
| 2 <sup>a</sup> | Infection                   | 100                     |                                 |                                    |                             |                                        |                                    | 38.0           | 14.4                                             |
| 6 <sup>a</sup> | Infection                   | 100                     |                                 |                                    |                             |                                        |                                    |                |                                                  |
| 7              | Infection                   | 150                     | 224.3                           | 68.0                               | 292.3                       | 2.24                                   | 2.92                               |                | 16.8                                             |
| 8              | Infection                   | 200                     |                                 |                                    |                             |                                        |                                    |                |                                                  |
| 13             | Infection                   | 250                     |                                 |                                    |                             |                                        |                                    |                |                                                  |
| 14             | Infection                   | 300(210) <sup>b</sup>   | 321.9                           | 105.7                              | 427.6                       | 1.53                                   | 2.04                               |                | 15.4                                             |
| 16             | After                       | 350                     |                                 |                                    |                             |                                        |                                    |                |                                                  |
| 17             | After                       | 400                     |                                 |                                    |                             |                                        |                                    |                |                                                  |
| 20             | After                       | 450                     |                                 |                                    |                             |                                        |                                    |                |                                                  |
| 21             | After                       | 450                     |                                 |                                    |                             |                                        |                                    |                | 7.3                                              |
| 29             | After                       | 450                     | 462.3                           | 185.2                              | 647.5                       | 1.03                                   | 1.44                               |                |                                                  |
| 36             | After                       | 450                     | 495.0                           | 185.3                              | 580.4                       | 1.10                                   | 1.51                               |                |                                                  |
| 42             | After                       | 450                     | 449.0                           | 188.0                              | 637.0                       | 1.00                                   | 1.42                               |                |                                                  |

C/D, concentration-to-dose; TDM, therapeutic drug monitoring; WBC, white blood cell count. Red font is used to explain that the concentrations were not in steady state. The TDM that provided the peak results is in orange font. Fever and WBC abnormal values are in blue font.

<sup>a</sup>Treatment with Chinese medications for influenza called Jing Hua Qing Gan capsule and Qing Re Jie Du Liquid were used.

<sup>b</sup>This concentration was not steady state, so we approximated the C/D ratios by dividing by the mean clozapine dose during the last 5 days, which was 210 mg/day. It was not used in the calculation of Table 1.

**SUPPLEMENTARY TABLE S16. Patient 14: Changes in clozapine steady-state TDM, clozapine dosages and WBC before, during and after respiratory viral infection with leukocytosis (possibly influenza)**

| Day             | Influenza               | Clozapine dose<br>(mg/day) | Clozapine concentration<br>(ng/ml) | Norclozapine concentration<br>(ng/ml) | Total concentration<br>(ng/ml) | Clozapine C/D ratio<br>(ng/ml per mg/day) | Total C/D ratio<br>(ng/ml per mg/day) | WBC count<br>(x 10 <sup>9</sup> cell/L)<br>4.0-10.0 |
|-----------------|-------------------------|----------------------------|------------------------------------|---------------------------------------|--------------------------------|-------------------------------------------|---------------------------------------|-----------------------------------------------------|
| -3              | Before                  |                            |                                    |                                       |                                |                                           |                                       |                                                     |
| 1               | Before                  | 50                         |                                    |                                       |                                |                                           |                                       |                                                     |
| 4               | Before                  | 100                        |                                    |                                       |                                |                                           |                                       |                                                     |
| 6               | Before                  | 150                        |                                    |                                       |                                |                                           |                                       |                                                     |
| 7               | Before                  | 150                        |                                    |                                       |                                |                                           |                                       | 4.7                                                 |
| 9               | Before                  | 175                        |                                    |                                       |                                |                                           |                                       |                                                     |
| 15              | Before                  | 175                        | 319.9                              | 181.4                                 | 501.3                          | 1.83                                      | 2.86                                  | 12.5                                                |
| 19 <sup>a</sup> | Infection               | 225                        |                                    |                                       |                                |                                           |                                       | 7.9                                                 |
| 22 <sup>a</sup> | Infection               | 225 <sup>b</sup> (215)     | 404.9                              | 210.4                                 | 615.3                          | 1.88                                      | 2.86                                  | 12.0                                                |
| 26 <sup>a</sup> | Infection               | 250                        |                                    |                                       |                                |                                           |                                       |                                                     |
| 27 <sup>a</sup> | Infection               | 250                        |                                    |                                       |                                |                                           |                                       | 12.9                                                |
| 29 <sup>a</sup> | Infection               | 250                        | 642.7                              | 264.9                                 | 907.6                          | 2.57                                      | 3.63                                  | 12.2                                                |
| 32 <sup>a</sup> | Infection               | 275                        |                                    |                                       |                                |                                           |                                       |                                                     |
| 33              | Infection               | 275                        |                                    |                                       |                                |                                           |                                       |                                                     |
| 35              | Infection               | 250                        |                                    |                                       |                                |                                           |                                       |                                                     |
| 36              | Infection               | 250 <sup>c</sup> (265)     | 720.1                              | 271.5                                 | 991.6                          | 2.72                                      | 3.74                                  | 15.6                                                |
| 43              | Recovering <sup>d</sup> | 250                        | 548.7                              | 220.7                                 | 769.4                          | 2.19                                      | 3.08                                  | 10.2                                                |
| 54              | After                   | 250                        | 444.                               | 185.8                                 | 629.9                          | 1.78                                      | 2.52                                  | 10.0                                                |

C/D, concentration-to-dose; TDM, therapeutic drug monitoring; WBC, white blood cell count. Red font is used to explain that the concentrations were not in steady state. The TDM that provided the peak results is in orange font. WBC abnormal values are in blue font.

<sup>a</sup>Jing Hua Qing Gan capsule, a Chinese medicine for influenza.

<sup>b</sup>The average dose during the last 5 days was 215 mg/day, which was used for calculating C/D ratios. They were not used for calculations in Table 1.

<sup>c</sup>The average dose during the last 5 days was 265 mg/day, which was used for calculating C/D ratios. They were not used for calculations in Table 1.

<sup>d</sup>This value was not entered in Table 1 as it was possibly contaminated because the patient was recovering from a long episode of respiratory viral infection and the leukocytes were slightly elevated.



**SUPPLEMENTARY TABLE S17. Patient 15: Changes in clozapine steady-state TDM, clozapine dosages and WBC before and during respiratory viral infection**

| Day             | Influenza | Clozapine dose<br>(mg/day) | Clozapine concentration<br>(ng/ml) | Norclozapine concentration<br>(ng/ml) | Total concentration<br>(ng/ml) | Clozapine C/D ratio<br>(ng/ml per mg/day) | Total C/D ratio<br>(ng/ml per mg/day) | WBC count<br>(x 10 <sup>9</sup> cell/L)<br>4.0-10.0 |
|-----------------|-----------|----------------------------|------------------------------------|---------------------------------------|--------------------------------|-------------------------------------------|---------------------------------------|-----------------------------------------------------|
| -4              | Before    |                            |                                    |                                       |                                |                                           |                                       |                                                     |
| 1               | Before    | 175                        |                                    |                                       |                                |                                           |                                       |                                                     |
| 4               | Before    | 200                        |                                    |                                       |                                |                                           |                                       |                                                     |
| 6               | Before    | 200                        |                                    |                                       |                                |                                           |                                       | 9.6                                                 |
| 10              | Before    | 225                        |                                    |                                       |                                |                                           |                                       |                                                     |
| 13              | Before    | 225                        |                                    |                                       |                                |                                           |                                       | 7.0                                                 |
| 15              | Before    | 275                        |                                    |                                       |                                |                                           |                                       |                                                     |
| 18              | Before    | 300                        |                                    |                                       |                                |                                           |                                       |                                                     |
| 27              | Before    | 300                        | 346.1                              | 168.9                                 | 515.0                          | 1.15                                      | 1.72                                  |                                                     |
| 34 <sup>a</sup> | Infection | 300                        | 931.9                              | 292.4                                 | 1224.3                         | 3.11                                      | 4.08                                  |                                                     |
| 38 <sup>a</sup> | Infection | 300                        |                                    |                                       |                                |                                           |                                       | 10.6                                                |

C/D, concentration-to-dose; TDM, therapeutic drug monitoring; WBC, white blood cell count. **The TDM that provided the peak results is in orange font. The WBC abnormal value is in blue font.**

<sup>a</sup>Jing Hua Qing Gan capsule, a Chinese medicine for influenza.

**SUPPLEMENTARY TABLE S18. Patient 27:<sup>a</sup> Changes in clozapine steady-state TDM, clozapine dosages and WBC during undiagnosed inflammation**

| Day | Inflammation             | Clozapine dose (mg/day) | Clozapine concentration (ng/ml) | Norclozapine concentration (ng/ml) | Total concentration (ng/ml) | Clozapine C/D ratio (ng/ml per mg/day) | Total C/D ratio (ng/ml per mg/day) | CRP mg/dL 0.0-0.8 | WBC count (x 10 <sup>9</sup> cell/L) 4.0-10.0 |
|-----|--------------------------|-------------------------|---------------------------------|------------------------------------|-----------------------------|----------------------------------------|------------------------------------|-------------------|-----------------------------------------------|
| -37 | Inflammation             | 0                       |                                 |                                    |                             |                                        |                                    |                   | <b>11.1</b>                                   |
| -36 | Inflammation             | 0                       |                                 |                                    |                             |                                        |                                    | <b>3.68</b>       | 9.3                                           |
| -29 | Inflammation             | 0                       |                                 |                                    |                             |                                        |                                    |                   | 9.4                                           |
| -22 | Inflammation             | 0                       |                                 |                                    |                             |                                        |                                    |                   | 7.6                                           |
| 1   | Inflammation             | 50                      |                                 |                                    |                             |                                        |                                    |                   |                                               |
| 2   | Inflammation             | 100 <sup>b</sup>        |                                 |                                    |                             |                                        |                                    |                   |                                               |
| 6   | Inflammation             | 125 (90)                | 356.2                           | 116.2                              | 472.4                       | 3.18                                   | 5.25                               |                   |                                               |
| 8   | Inflammation             | 175                     |                                 |                                    |                             |                                        |                                    |                   |                                               |
| 13  | Inflammation             | 175                     | 777.3                           | 260.4                              | 1037.7                      | 4.44                                   | 5.93                               | <b>3.14</b>       | 9.6                                           |
| 17  | Inflammation             | 150                     |                                 |                                    |                             |                                        |                                    |                   |                                               |
| 20  | Inflammation             | 150                     | 679.4                           | 249.8                              | 929.2                       | 4.53                                   | 6.19                               |                   | <b>10.7</b>                                   |
| 21  | Inflammation             | 150                     |                                 |                                    |                             |                                        |                                    | <b>5.55</b>       |                                               |
| 27  | Inflammation             | 150                     | 433.9                           | 197.2                              | 631.1                       | 2.89                                   | 4.21                               |                   | <b>11.1</b>                                   |
| 28  | Inflammation             | 75 <sup>c</sup>         |                                 |                                    |                             |                                        |                                    |                   |                                               |
| 34  | Improvement <sup>d</sup> | 75                      | 118.3                           | 31.9                               | 150.2                       | 1.58                                   | 2.00                               | <b>1.37</b>       | 7.1                                           |
| 40  | Improvement              | 100                     |                                 |                                    |                             |                                        |                                    |                   |                                               |
| 41  | Improvement              | 100 (80) <sup>e</sup>   | 340.8                           | 101.5                              | 442.3                       | 4.26                                   | 5.53                               | 0.45              | 6.9                                           |
| 48  | Inflammation             | 125 (100) <sup>f</sup>  | 314.4                           | 113.6                              | 428.0                       | 3.14                                   | 4.28                               |                   | 9.8                                           |
| 50  | Inflammation             | 150                     |                                 |                                    |                             |                                        |                                    |                   |                                               |
| 55  | Inflammation             | 150                     | 410.4                           | 159.9                              | 570.3                       | 2.74                                   | 3.80                               |                   | 7.8                                           |
| 56  | Inflammation             | 150                     |                                 |                                    |                             |                                        |                                    | 0.65              |                                               |
| 62  | Inflammation             | 150                     | <b>867.9</b>                    | <b>302.4</b>                       | <b>1170.3</b>               | <b>5.79</b>                            | <b>7.80</b>                        |                   | <b>11.0</b>                                   |
| 69  | Inflammation             | 150                     | 566.9                           | 233.1                              | 800.0                       | 3.78                                   | 5.33                               | <b>1.7</b>        | <b>10.1</b>                                   |
| 74  | Inflammation             | 125                     |                                 |                                    |                             |                                        |                                    |                   |                                               |
| 76  | Inflammation             | 125 (140) <sup>g</sup>  | 690.3                           | 234.9                              | 925.2                       | 4.93                                   | 6.61                               |                   | <b>12.7</b>                                   |

C/D, concentration-to-dose; CRP, c-reactive protein; TDM, therapeutic drug monitoring; WBC, white blood cell count. **Green font is used to describe the TDM that was used as a baseline. It was partly contaminated by infection, but it appeared to us the most reasonable option that we had. Red font is used to explain that the concentrations were not in steady state. The TDM that provided the peak results is in orange font. WBC and CRP abnormal values are in blue font.**

<sup>a</sup>When we reviewed the 5 patients previously classified as possible genetic clozapine poor metabolizers [3], we discovered that the treating physician had missed an inflammation in one of the patients that was present before clozapine treatment and throughout the admission. Patient

27 appeared to have an undiagnosed inflammation/infection that lasted >100 days during hospital admission (37 before clozapine and 77 while on clozapine). The CRP was elevated almost all the time and leukocytosis was intermittently elevated.

<sup>b</sup>The patient was diagnosed with sinus tachycardia.

<sup>c</sup>The clozapine dose was probably reduced because of high serum concentration.

<sup>d</sup>After the clozapine dose was reduced to 75 mg/day, leukocytes became normal and the CRP level was substantially decreased although it did not become normal.

<sup>d</sup>The average clozapine dose during the last 5 days was 80 mg/day, which was used for calculating C/D ratios. They were not used for calculations in Table 1.

<sup>e</sup>The clozapine dose during the prior 5 days was 100 mg/day and was steady-state.

<sup>f</sup>The average clozapine dose during the last 5 days was 140 mg/day, which was used for calculating C/D ratios. They were not used for calculations in Table 1.
